# Supplementary material
Source: PubMed Central journal article supplement (PMC6477908)
Supplement: DB180686SupplementaryData1.pdf [file DB180686SupplementaryData1.pdf]

## SUPPLEMENTARY DATA

**Supplementary Table S1.** Demographics and identifiers of donor samples. Isolated  $\beta$ -cells from donors used for transcriptome analyses and tissue sections from donors without diabetes (w/o diabetes) and donors with type 1 diabetes used for immunohistochemical analyses (immunohistochemical and/or immunofluorescence, IHC/IF), RNA-Seq, or flow cytometry (FC) are listed from the EADB, DiViD, VU/UMass (VU/UMass cohort were obtained through a collaborative agreement with Vanderbilt University), or from UMass (from either Prodo Labs or IIDP, RRID codes) cohorts. Partial data previously described for the samples 13226 and 13255 in (23) and for T1D.6 in (3). N/A: not applicable. N/R: not reported. w, m, y: weeks, months, or years of disease duration.

### A- Donors without diabetes

| Case Code | RRID Source: IIDP | Case Type    | Cohort   | Use of islets | Age (years) | Sex |
|-----------|-------------------|--------------|----------|---------------|-------------|-----|
| PM65/71   |                   | w/o diabetes | EADB     | IHC/IF        | 40          | M   |
| 8579      |                   | w/o diabetes | EADB     | IHC/IF        | 7           | N/R |
| 330/71    |                   | w/o diabetes | EADB     | IHC/IF        | 47          | M   |
| 184/90    |                   | w/o diabetes | EADB     | IHC/IF        | 5           | M   |
| 17188     |                   | w/o diabetes | VU/UMass | RNAseq        | 10          | F   |
| 14223     |                   | w/o diabetes | VU/UMass | RNAseq, FC    | 11          | M   |
| 16149     |                   | w/o diabetes | VU/UMass | RNAseq        | 11          | M   |
| 16181     |                   | w/o diabetes | VU/UMass | RNAseq        | 12          | F   |
| 16191     |                   | w/o diabetes | VU/UMass | RNAseq        | 12          | F   |
| 16278     | SAMN0876 9124     | w/o diabetes | UMass    | RNAseq        | 15          | M   |
| 16029     |                   | w/o diabetes | VU/UMass | RNAseq        | 16          | M   |
| 16338     |                   | w/o diabetes | VU/UMass | RNAseq        | 16          | F   |
| 17181     |                   | w/o diabetes | VU/UMass | RNAseq        | 16          | M   |
| 13226     |                   | w/o diabetes | UMass    | RNAseq        | 18          | M   |
| 17103     |                   | w/o diabetes | VU/UMass | RNAseq        | 19          | M   |
| 15049     |                   | w/o diabetes | UMass    | RNAseq        | 23          | M   |
| 13255     | SAMN0878 3913     | w/o diabetes | UMass    | RNAseq        | 30          | M   |
| 18076     |                   | w/o diabetes | UMass    | FC            | 33          | F   |
| 14128     | SAMN0877 5087     | w/o diabetes | VU/UMass | FC            | 45          | M   |
| 14149     | SAMN0877 5077     | w/o diabetes | VU/UMass | FC            | 49          | F   |
| 14219     | SAMN0877 5025     | w/o diabetes | UMass    | FC            | 52          | F   |

### B- Donors with type 1 diabetes

| Case Code | Case Type | Cohort   | Use of islets    | Age (years) | Sex | Time from diagnosis |
|-----------|-----------|----------|------------------|-------------|-----|---------------------|
| E560      | T1D       | EADB     | IHC/IF           | 42          | F   | 18m                 |
| E124B     | T1D       | EADB     | IHC/IF           | 17          | M   | 1w                  |
| E375      | T1D       | EADB     | IHC/IF           | 11          | F   | 1w                  |
| 11746     | T1D       | EADB     | IHC/IF           | 6           | M   | <1w                 |
| 11713     | T1D       | EADB     | IHC/IF           | 3           | M   | 3m                  |
| Sc76      | T1D       | EADB     | IHC/IF           | 21          | M   | 3w                  |
| Sc115     | T1D       | EADB     | IHC/IF           | 1           | F   | <1w                 |
| Sc109     | T1D       | EADB     | IHC/IF           | 20          | M   | 6y                  |
| 9256      | T1D       | EADB     | IHC/IF           | 2           | M   | 2w                  |
| 8566      | T1D       | EADB     | IHC/IF           | 12          | F   | 3w                  |
| DIV1D1    | T1D       | DIV1D    | IHC/IF           | 25          | F   | 4w                  |
| DIV1D2    | T1D       | DIV1D    | IHC/IF           | 24          | M   | 3w                  |
| DIV1D3    | T1D       | DIV1D    | IHC/IF           | 34          | F   | 9w                  |
| DIV1D4    | T1D       | DIV1D    | IHC/IF           | 31          | M   | 5w                  |
| DIV1D5    | T1D       | DIV1D    | IHC/IF           | 24          | F   | 5w                  |
| DIV1D6    | T1D       | DIV1D    | IHC/IF           | 35          | M   | 5w                  |
| nPOD6414  | T1D       | nPOD     | RNAseq IHC/IF/FC | 23          | M   | 5m                  |
| nPOD6480  | T1D       | nPOD     | FC               | 17          | M   | 2y                  |
| nPOD6367  | T1D       | nPOD     | RNAseq IHC/IF/FC | 24          | M   | 2y                  |
| nPOD6268  | T1D       | nPOD     | RNAseq           | 12          | F   | 3y                  |
| nPOD6323  | T1D       | nPOD     | FC               | 22          | F   | 6y                  |
| T1D.6     | T1D       | VU/UMass | RNAseq           | 20          | M   | 7y                  |
| T1D.18    | T1D       | VU/UMass | FC               | 24          | F   | 18y                 |
| T1D.19    | T1D       | VU/UMass | FC               | 54          | F   | 14y                 |
| T1D.13    | T1D       | VU/UMass | FC               | 56          | M   | 25y                 |

SUPPLEMENTARY DATA

**Supplementary Table S2.** Antibody details and immunocytochemistry conditions used for staining human pancreas specimens are detailed.

IHC; immunohistochemistry, IF; immunofluorescence.

| Primary Antibody | Manufacturer and clone                        | Antigen Retrieval         | Antibody Dilution | Incubation Time with Primary Antibody | Secondary Detection System                                                                                                                                                                                                     |
|------------------|-----------------------------------------------|---------------------------|-------------------|---------------------------------------|--------------------------------------------------------------------------------------------------------------------------------------------------------------------------------------------------------------------------------|
| CIITA            | Santa Cruz<br>C#sc-13556<br>Mouse monoclonal  | 10mM citrate pH6.0        | 1/100             | IHC 1h RT                             | Immunohistochemistry using Dako REAL™ Envision™ Detection System or immunofluorescence using tyramine signal amplification kit (HRP conjugated secondary antibody: 1/100 for 1h, fluorescent tyramide substrate; 1/100 10mins) |
|                  |                                               |                           |                   | IF o/n 4°C                            |                                                                                                                                                                                                                                |
| HLA-DR           | Santa Cruz<br>C#sc-25614<br>Rabbit polyclonal | 10mM citrate pH6.0        | 1/400             | IHC 1h RT                             | Immunohistochemistry using Dako REAL™ Envision™ Detection System or immunofluorescence using tyramine signal amplification kit (HRP conjugated secondary antibody: 1/100 for 1h, fluorescent tyramide substrate; 1/100 10mins) |
|                  |                                               |                           |                   | IF o/n 4°C                            |                                                                                                                                                                                                                                |
| HLA-ABC          | Abcam<br>C#ab70328<br>Mouse monoclonal        | 10mM citrate pH6.0        | 1/1000            | 1h at RT                              | Immunofluorescence staining using anti-mouse IgG (H+L) Alexa Fluor™-conjugated secondary antibodies (1/400 for 1hr)                                                                                                            |
| Insulin          | Dako<br>C#A0564<br>Guinea-pig polyclonal      | 10mM citrate pH6.0        | 1/700             | 1h at RT                              | Immunofluorescence staining using anti-guinea-pig IgG (H+L) Alexa Fluor™ -conjugated secondary antibodies (1/400 for 1hr)                                                                                                      |
| CD45             | Dako<br>C#M0701<br>Mouse monoclonal           | 10mM citrate pH6.0        | 1/1000            | 1h at RT                              | Immunofluorescence using tyramine signal amplification kit (HRP conjugated secondary antibody: 1/100 for 1h, fluorescent tyramide substrate; 1/100 10mins)                                                                     |
| CD68             | Dako<br>C#M0876<br>Mouse monoclonal           | 10mM citrate pH6.0        | 1/400             | 1h at RT                              | Immunofluorescence staining using anti-mouse IgG (H+L) Alexa Fluor™-conjugated secondary antibodies (1/400 for 1hr)                                                                                                            |
| CD80             | Abcam<br>C#ab86473<br>Mouse monoclonal        | 10mM citrate pH6.0        | 1/500             | o/n at 4°C                            | Immunohistochemistry using Dako REAL™ Envision™ Detection System or immunofluorescence staining using anti-mouse IgG (H+L) Alexa Fluor™-conjugated secondary antibodies (1/400 for 1hr)                                        |
| CD86             | Abcam<br>C#ab53004<br>Rabbit monoclonal       | 10mM Tris, 1mM EDTA pH9.0 | 1/300             | o/n at 4°C                            | Immunohistochemistry using Dako REAL™ Envision™ Detection System                                                                                                                                                               |
| VP1              | Dako<br>C#M7064<br>Mouse monoclonal           | 10mM citrate pH6.0        | 1/2000            | o/n at 4°C                            | Immunofluorescence staining using anti-mouse IgG (H+L) Alexa Fluor™-conjugated secondary antibodies (1/400 for 1hr)                                                                                                            |

SUPPLEMENTARY DATA

**Supplementary Table S3.** Case by case examination of CIITA and Class II staining. Green colour indicates cases in which CIITA was absent, whereas red colour demarks cases containing CIITA positive islets. ND: not determined.

| Case Code | Case Type            | Islets + or – for CIITA | Number of Class II <sup>+</sup> islets |
|-----------|----------------------|-------------------------|----------------------------------------|
| PM65/71   | without diabetes     | -                       | 0                                      |
| 8579      | without diabetes     | -                       | 0                                      |
| 330/71    | without diabetes     | -                       | 0                                      |
| 184/90    | without diabetes     | -                       | 0                                      |
| Sc109     | with type 1 diabetes | -                       | 0                                      |
| 9256      | with type 1 diabetes | -                       | 0                                      |
| 8566      | with type 1 diabetes | -                       | 1                                      |
| E375      | with type 1 diabetes | -                       | ND                                     |
| E560      | with type 1 diabetes | +                       | 16                                     |
| E124B     | with type 1 diabetes | +                       | 84                                     |
| Sc76      | with type 1 diabetes | +                       | 113                                    |
| SC115     | with type 1 diabetes | +                       | ND                                     |
| 11746     | with type 1 diabetes | +                       | 22                                     |
| 11713     | with type 1 diabetes | +                       | 16                                     |
| DiViD3    | with type 1 diabetes | +                       | 26                                     |
| DiViD6    | with type 1 diabetes | +                       | 2                                      |

SUPPLEMENTARY DATA

**Supplementary Figure S1.** Bulk  $\beta$  cell population, as sorted by intracellular insulin staining, isolated from donors with type 1 diabetes shows increased HLA Class I mRNA expression.  $\beta$  cell gene expression (shown as expected counts of raw values calculated using RSEM) in donors without diabetes (N=12, open circles) and with type 1 diabetes (N=4, filled shapes, circle: nPOD 6414, diamond: nPOD 6367, square: nPOD 6268, triangle: T1D.6) are shown on the ordinate for 4 HLA Class I mRNA species (*HLA-A*, *HLA-B*, *HLA-C*, and *HLA-F*) and the HLA Class I transactivator, *NLRC5*. The fold change increase in expression from donors with type 1 diabetes and the adjusted *p* value are shown below the abscissa. Bars indicate the mean values +SEM.

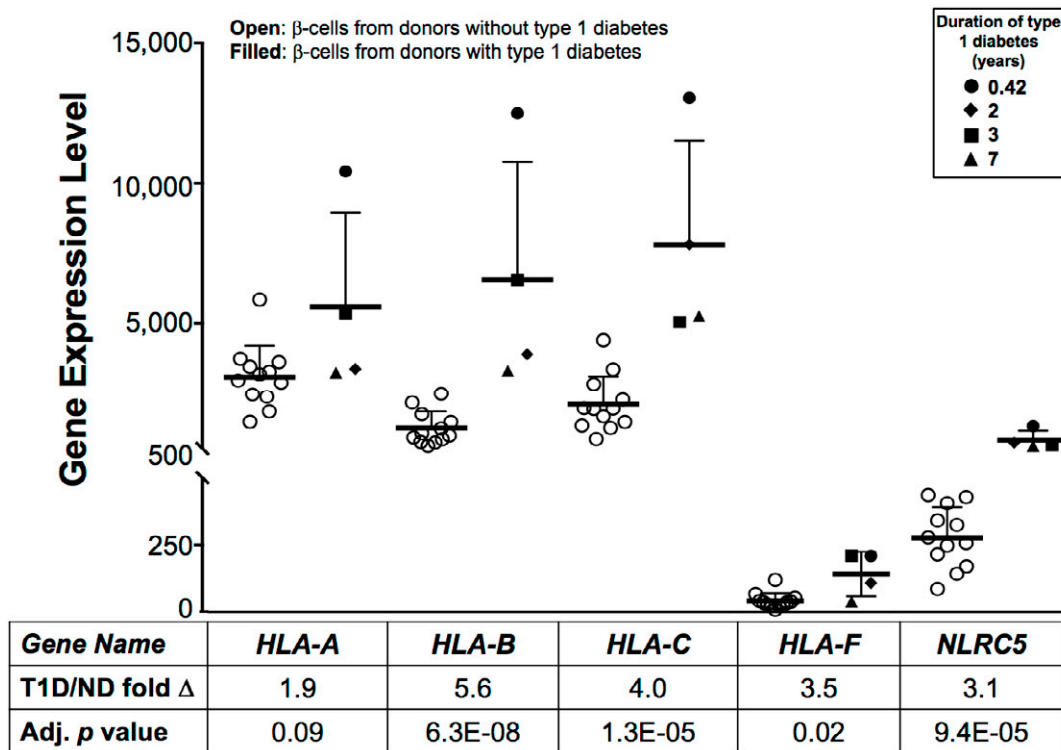

## SUPPLEMENTARY DATA

**Supplementary Figure S2.** CIITA is expressed in the tonsil, and has predominantly a cytosolic localisation. (A) Representative image of tonsil tissue from a single donor stained using an immunoperoxidase approach probed with an antibody raised against CIITA. An enlargement of the highlighted area (dotted white box) is presented (B). The white arrow indicates cells with high levels of cytoplasmic, but low nuclear CIITA. Images were captured at x400 magnification; scale bar (A) 50 $\mu$ m, (B) 20 $\mu$ m.

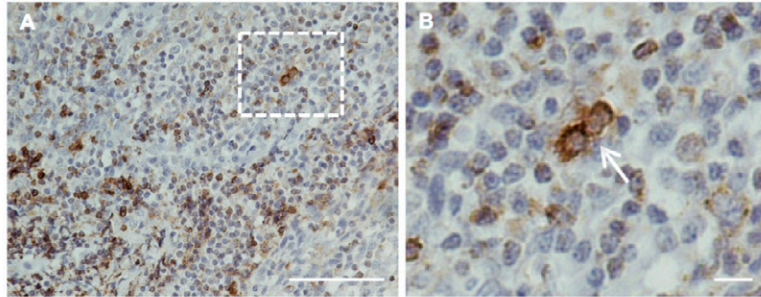



SUPPLEMENTARY DATA

**Supplementary Figure S3.** Surface expression of HLA Class II on  $\beta$ -cells. From a single donor with T1D (nPOD 6367) from which RNA transcriptome data is shown in Figs. 1 and 2 and Supplementary Fig. 1, pancreas tissue was stained with antibodies to HLA Class II (green, A, D), insulin (light blue, B, D), and CIITA (red, C, D). Merged images are shown (D). White arrows denote a Class II<sup>+</sup>insulin<sup>-</sup>CIITA<sup>+</sup> cell. Images captured at x400 magnification; scale bar, 10 $\mu$ m. A high-resolution image of the same cell shown in Fig. 5 (Fig. 5 A-E) was captured using deconvolution software at x630 magnification with optical zoom (E-G). The yellow arrows indicate areas in which Class II and HLA-F co-localise. An entire z-stack of this region is presented in the **Supplementary Video**. CD45<sup>+</sup> cells from islets are detected by flow cytometry. As described in Fig. 5, islets were dispersed and surface stained for CD45 and HLA-DR. Examples of the CD45<sup>-</sup> and CD45<sup>+</sup> populations within two islet samples [nPOD6367 (an islet sample analyzed for transcriptome, Figs. 1 and 2) (H) and T1D.19 (I)] are shown. A representative profile of surface CD45<sup>+</sup> cells for HLA-DR staining is shown for T1D.19 (J). CD45<sup>-</sup> cells were then analyzed for surface HLA-DR and intracellular insulin as shown in Fig. 5. Representative plots are shown for islets for induction of surface HLA Class II expression on islet  $\beta$ -cells by pro-inflammatory cytokines (K and L). 2000 IEQ from a control, non-diabetic donor (18076) were treated +/- proinflammatory cytokines as indicated in the figure for 48 hours. Islets were collected, dispersed with enzyme, stained with viability dye, blocked, surface stained for CD45 and HLA-DR (L243), washed, fixed/permeabilized and stained intracellularly for glucagon and insulin as described. Approximately 50% of insulin<sup>+</sup>  $\beta$ -cells upregulated surface HLA-DR upon treatment with proinflammatory cytokines. Similar results were seen with 3 other islet isolations.

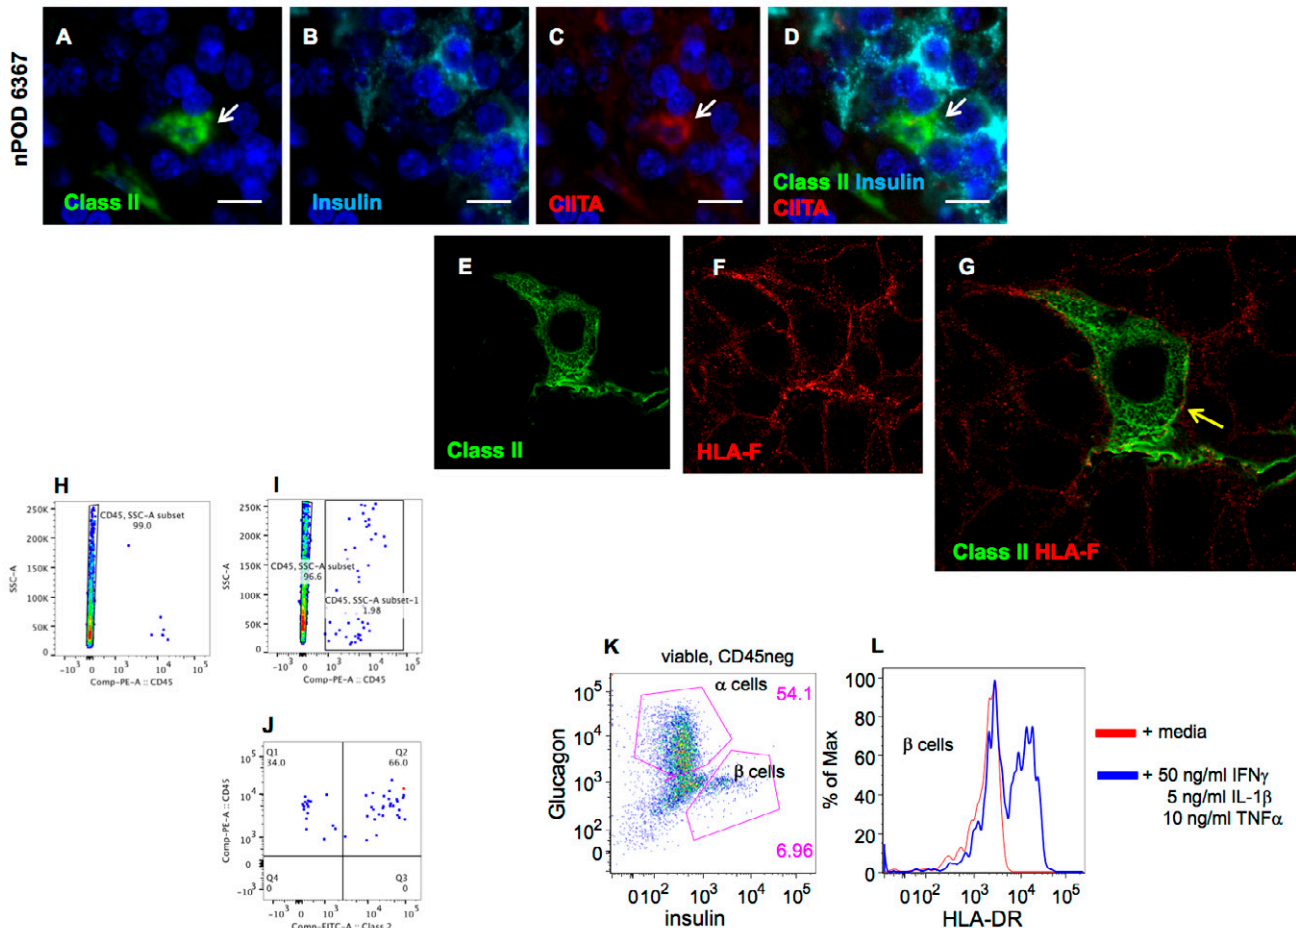

SUPPLEMENTARY DATA

**Supplementary Figure S4.** CIITA expression does not correlate with the presence of Class I or enterovirus VP1, in the islets of donors with type 1 diabetes. Representative images from pancreas sections of individuals with type 1 diabetes stained with antisera raised against CIITA (A, red), Class I (B, green), Class II (D, red), VP1 (E, green) and insulin (C, F, light blue). Merged images are presented (C, F). White arrows in the upper panel (A-C) point to examples of CIITA immunopositive cells. White arrows (D-F, lower panels) indicate Class II positive cells that are negative for VP1. Yellow arrows show a VP1 positive cell which is immunonegative for Class II. Red arrows indicate an example of an immune cell that stains positive for HLA Class II in the islet periphery. Images captured at x400 magnification; scale bar 20µm.

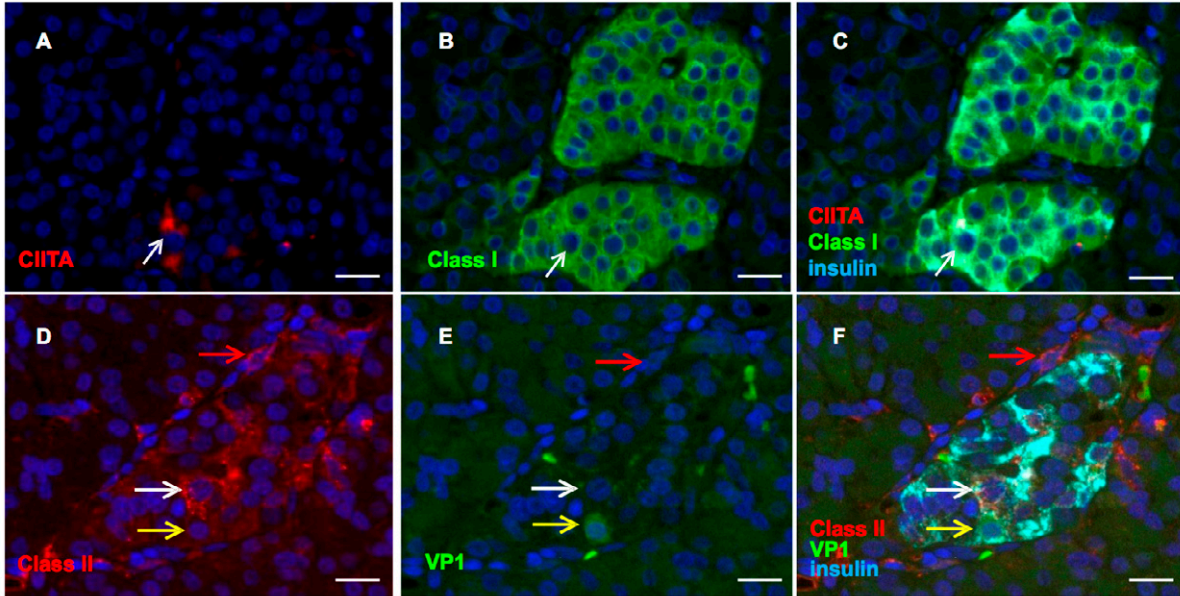

SUPPLEMENTARY DATA

**Supplementary Figure S5.** Class I and Class II expression do not correlate within islets. Representative immunofluorescence image of a pancreas section from a donor with type 1 diabetes stained for Class I (A, D: red), Class II (B, D: green) and insulin (C, D: light blue). The white arrow indicates an islet cell co-expressing Class I and Class II, whereas the yellow arrow marks a cell within the islet that is positive for Class I, but negative for Class II. Islet associated endothelial cells expressing Class II were also observed (green arrow). Images captured at x400 magnification; scale bars, 20 $\mu$ m.

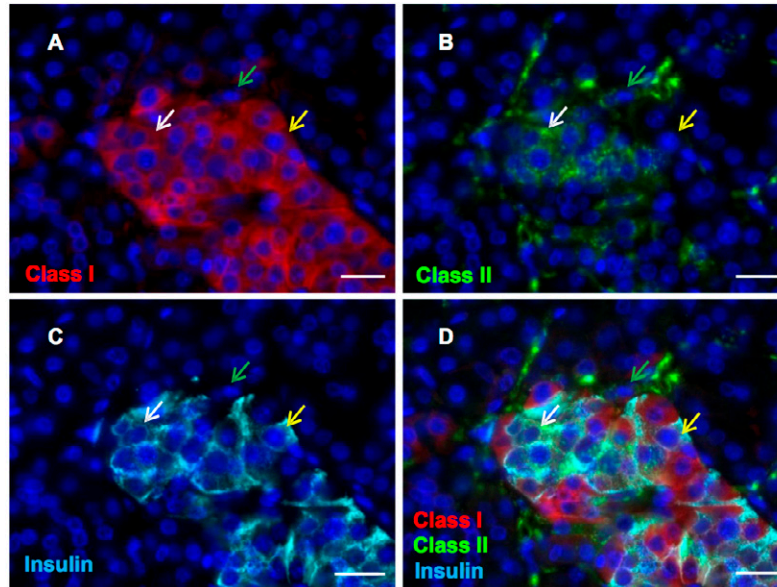



SUPPLEMENTARY DATA

**Supplementary Figure S6.** Upregulated protein and mRNA species in  $\beta$  cells from donors with type 1 diabetes from the HLA Class I processing and presentation pathway. The observed upregulated proteins and mRNA species from the HLA Class I processing and presentation pathway in  $\beta$  cells from donors with type 1 diabetes are displayed according to their intracellular locations and with their functions. Depicted by symbols with black borders are upregulated proteins (red circles) and mRNA species (red squares), while putative upregulated proteins identified by upregulated mRNA species are shown with red ovals, diamonds or elongated ovals, and gray ovals depict mRNA species that were detected, but not upregulated in the islets of donors with type 1 diabetes. A detected, upregulated protein, STAT1 (9), but without mRNA detection, is indicated by an empty circle with a black border.

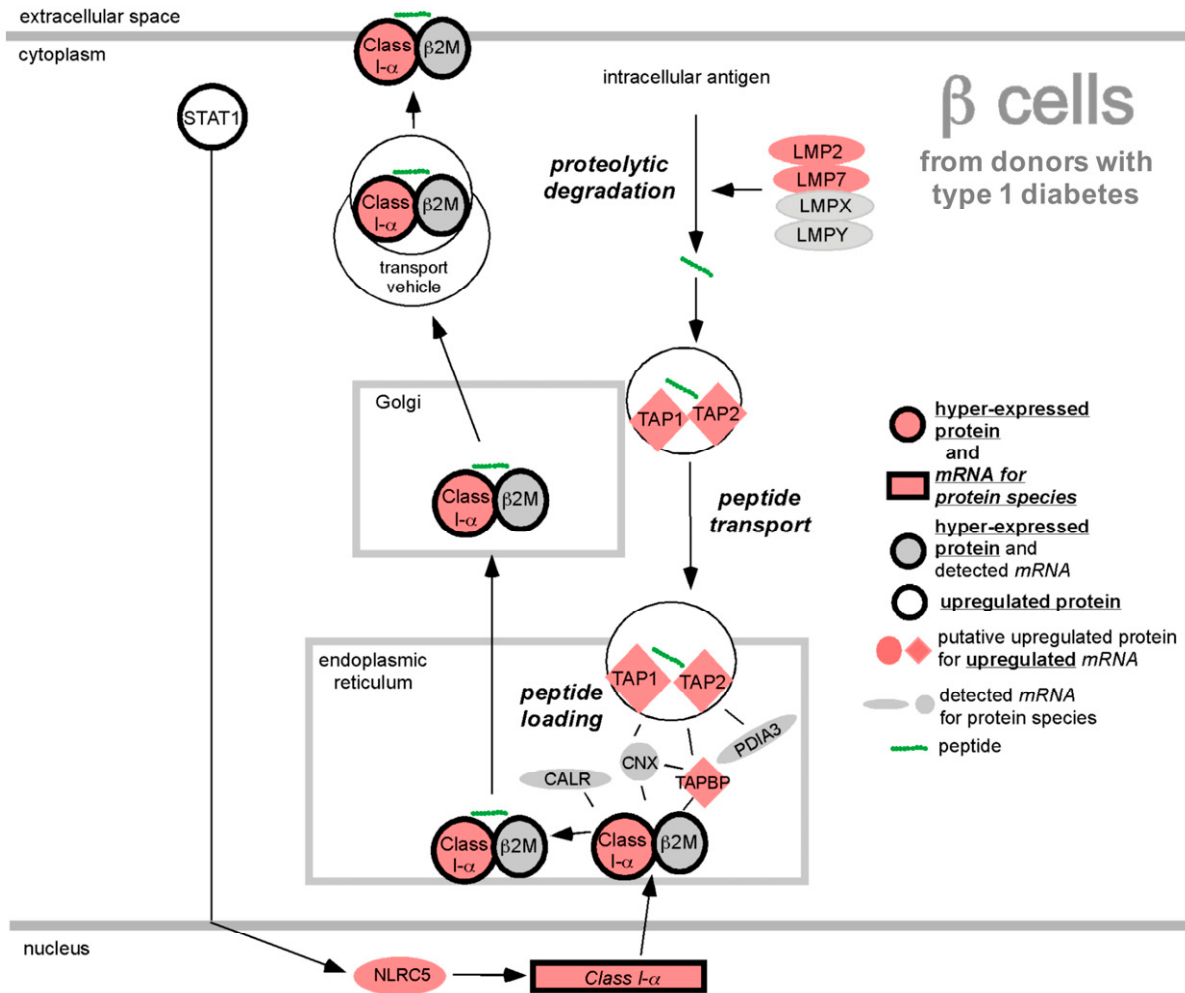

## SUPPLEMENTARY DATA

**Supplementary Video.** z-stack of HLA Class II and HLA -F co-localise on the surface of an islet cell in a donor with type 1 diabetes. A high-resolution z-stack of the islet shown in Fig. 5 A-E and Supplementary Fig. 3A-D is presented. Sections from a donor with type 1 diabetes (E560) were stained with antisera against Class II (green) and HLA-F (red), with areas of co-localisation appearing yellow. This islet was imaged using deconvolution software at x630 magnification with additional optical zoom.
